# Supplementary material for: Investigation of a halloysite-based fluorescence probe with a highly selective and sensitive “turn-on” response upon hydrogen peroxide
Source: Royal Society of Chemistry journal article supplement (doi:10.1039/c7ra10210k), 2017-01-01
Supplement: c7ra10210k1.pdf [file c7ra10210k1.pdf]

**Investigation of a Halloysite-Based Fluorescence Probe with  
a Highly Selective and Sensitive “Turn-On” Response upon  
Hydrogen Peroxide**

----- Supporting Information

Jingwei Dong, Zhihang Zhao, Rui Liu, Hailei Zhang\*, Yongang Wu and Xinwu Ba\*

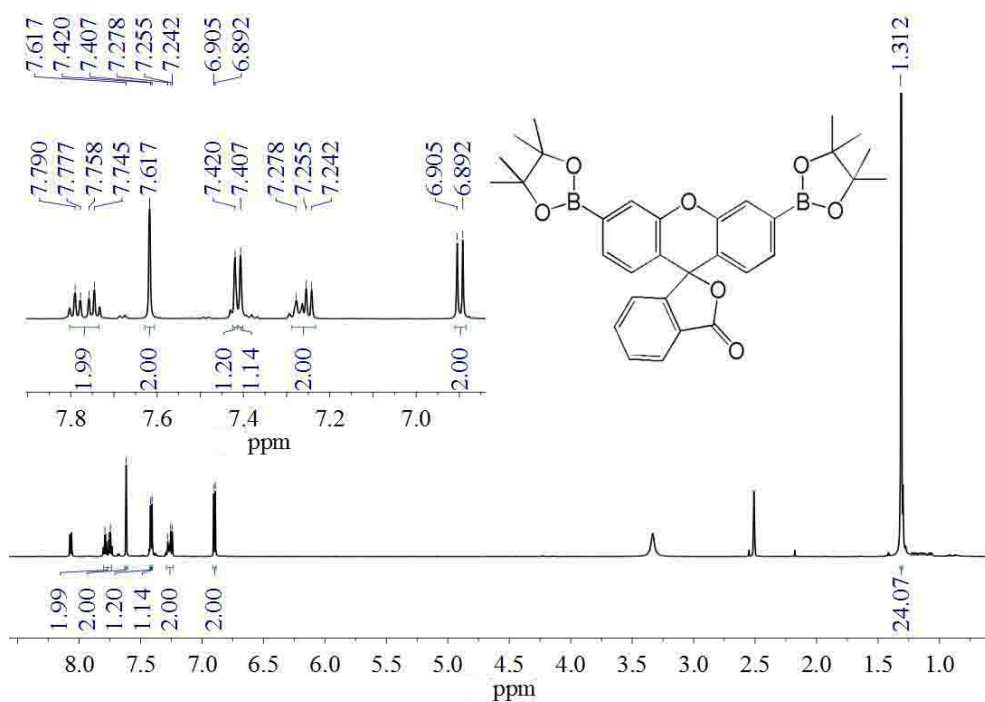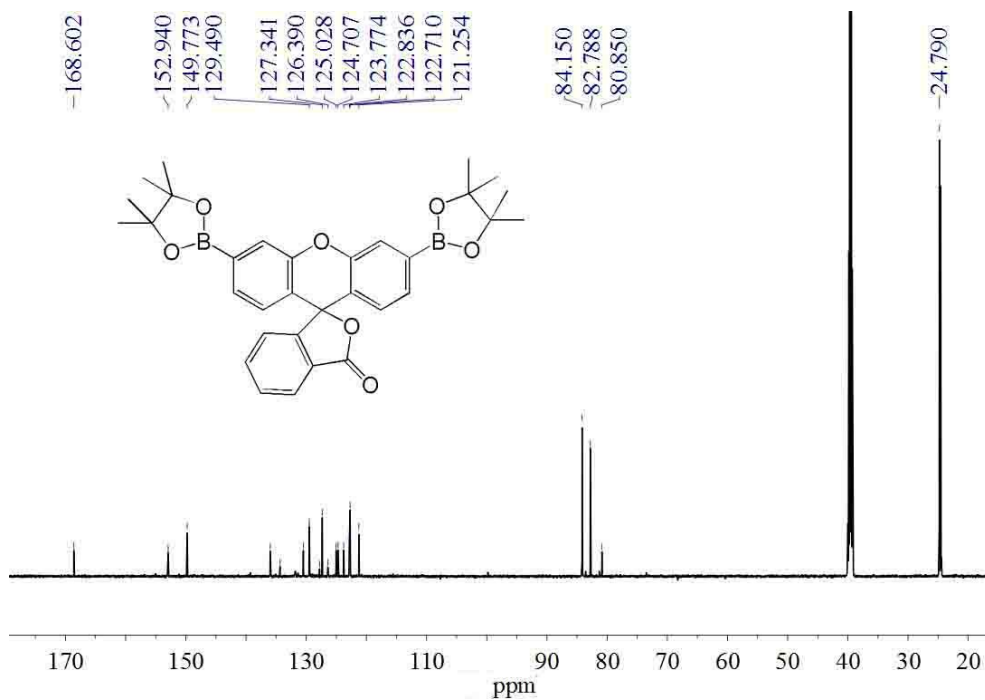

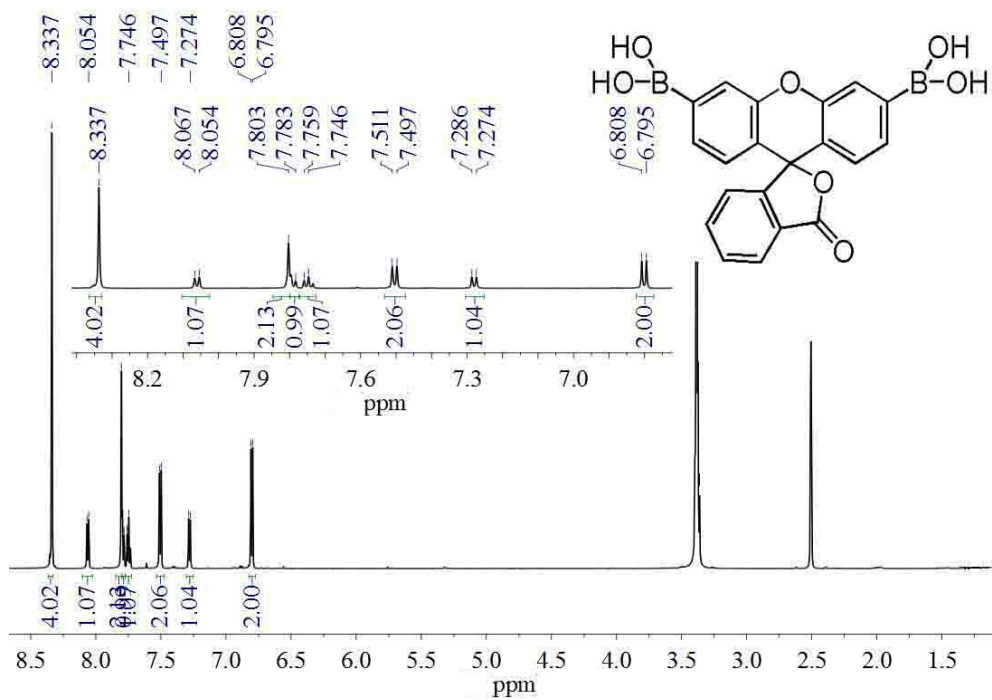

Figure S3. <sup>1</sup>H NMR spectrum of PA

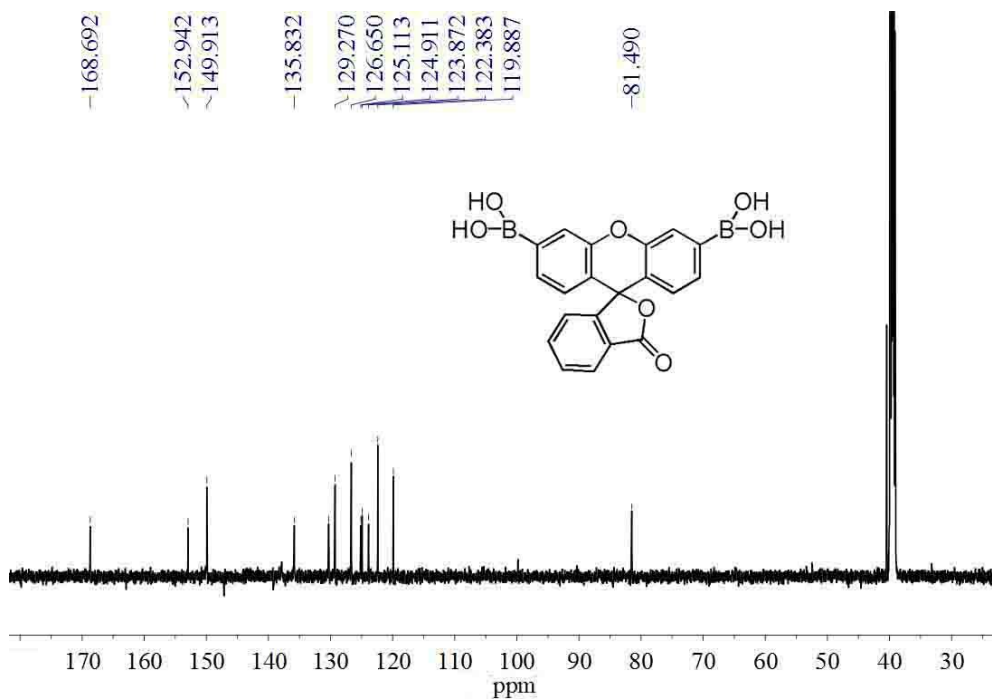

Figure S4. <sup>13</sup>C NMR spectrum of PA

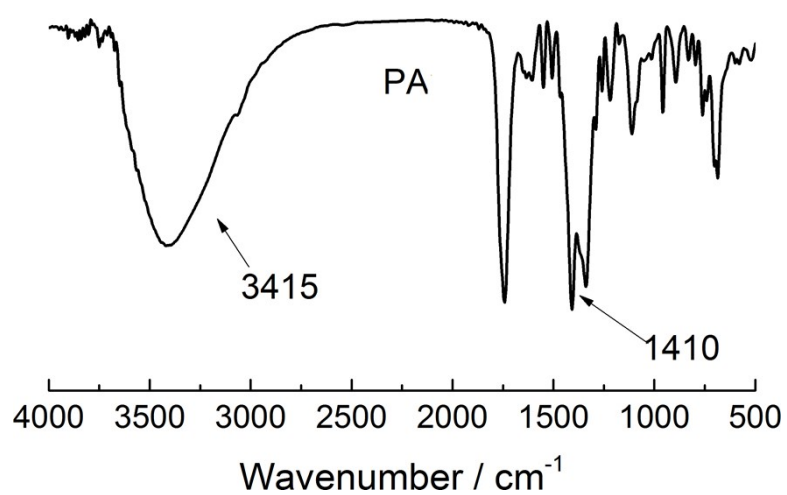

**Figure S5.** the FTIR spectrum of PA

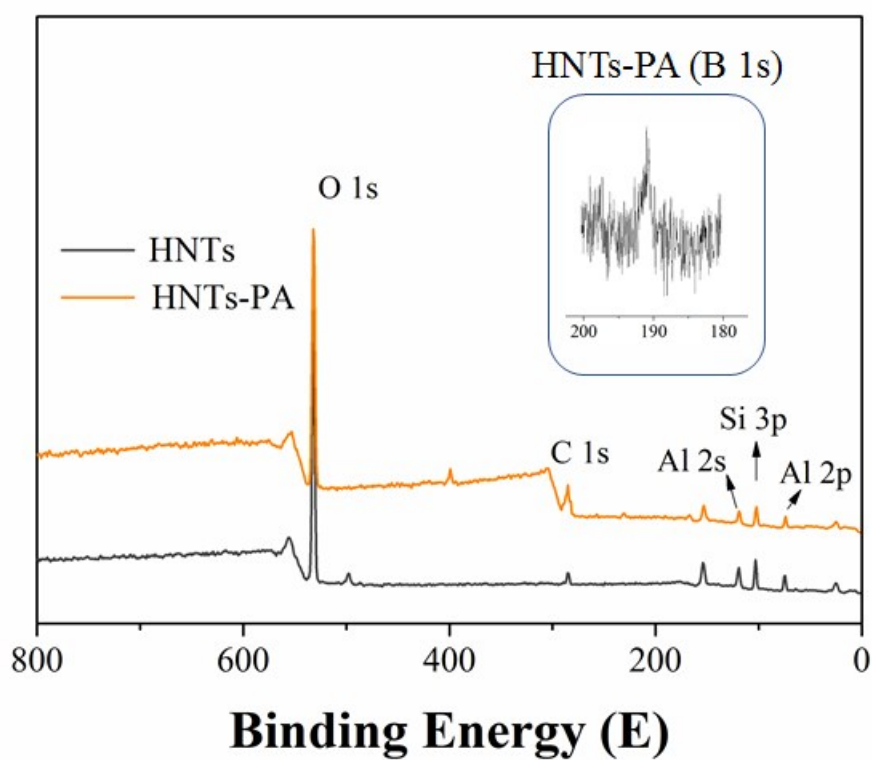

**Figure S6.** XPS spectra of HNTs and HNTs-PA

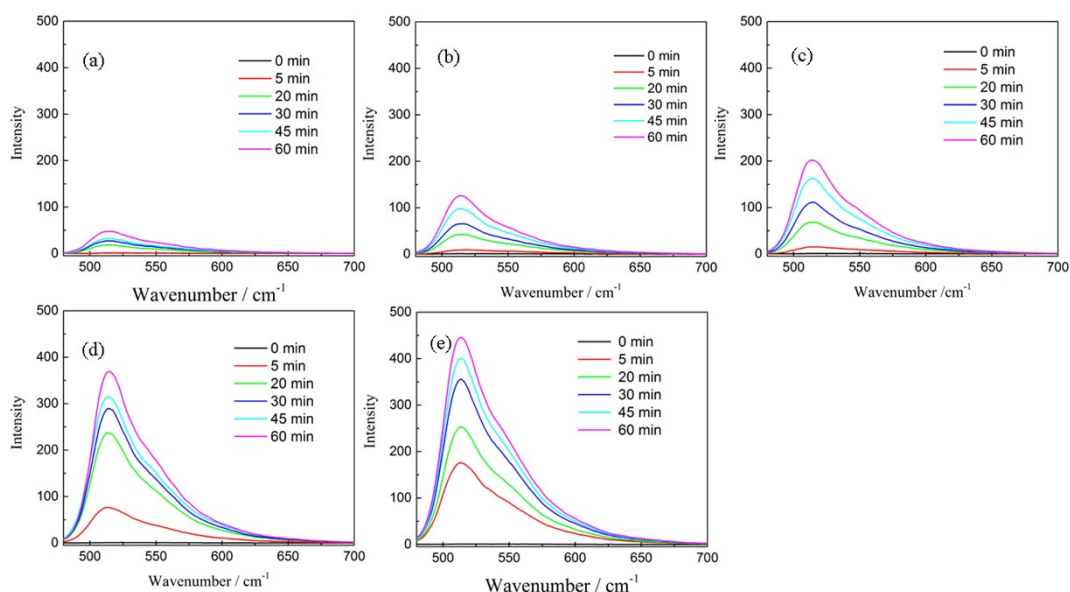

**Figure S7.** Fluorescence turn-on response of 0.1 mg/mL HNTs-PA. Data were acquired at 25 °C in 2 mL H<sub>2</sub>O, with excitation at  $\lambda=470$  nm and emission was collected between 480-700 nm. Time points represent 0-60 min after the addition of different times H<sub>2</sub>O<sub>2</sub> (different times to the mole number of PA). (a) [H<sub>2</sub>O<sub>2</sub>] =  $5 \times 10^{-5}$  M (the addition amount of H<sub>2</sub>O<sub>2</sub> is  $1 \times 10^{-7}$  mol); (b) [H<sub>2</sub>O<sub>2</sub>] =  $2.5 \times 10^{-4}$  M; (c) [H<sub>2</sub>O<sub>2</sub>] =  $5 \times 10^{-4}$  M; (d) [H<sub>2</sub>O<sub>2</sub>] =  $2.5 \times 10^{-3}$  M; (e) [H<sub>2</sub>O<sub>2</sub>] =  $2.5 \times 10^{-2}$  M. The turn-on response of each probe was completed at these time points.

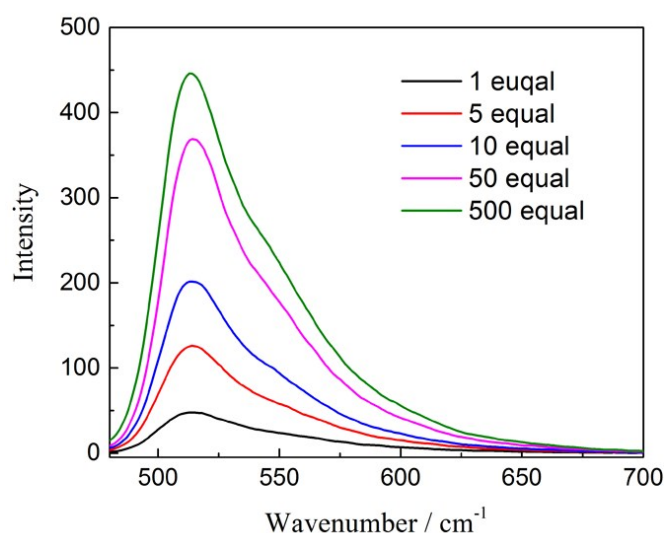

**Figure S8.** Fluorescence “turn-on” response of 0.1 mg/mL HNTs-PA. Data were acquired at 25 °C in 2 mL H<sub>2</sub>O, with excitation at  $\lambda=470$  nm and emission was collected between 480-700 nm for HNTs-PA. Time points represent 60 min after the addition of different times H<sub>2</sub>O<sub>2</sub> (1 equal represents [H<sub>2</sub>O<sub>2</sub>] =  $5 \times 10^{-5}$  M; 5 equal represents [H<sub>2</sub>O<sub>2</sub>] =  $2.5 \times 10^{-4}$  M; 10 equal represents [H<sub>2</sub>O<sub>2</sub>] =  $5 \times 10^{-4}$  M; 50 equal represents [H<sub>2</sub>O<sub>2</sub>] =  $2.5 \times 10^{-3}$  M; 500 equal represents [H<sub>2</sub>O<sub>2</sub>] =  $2.5 \times 10^{-2}$  M).

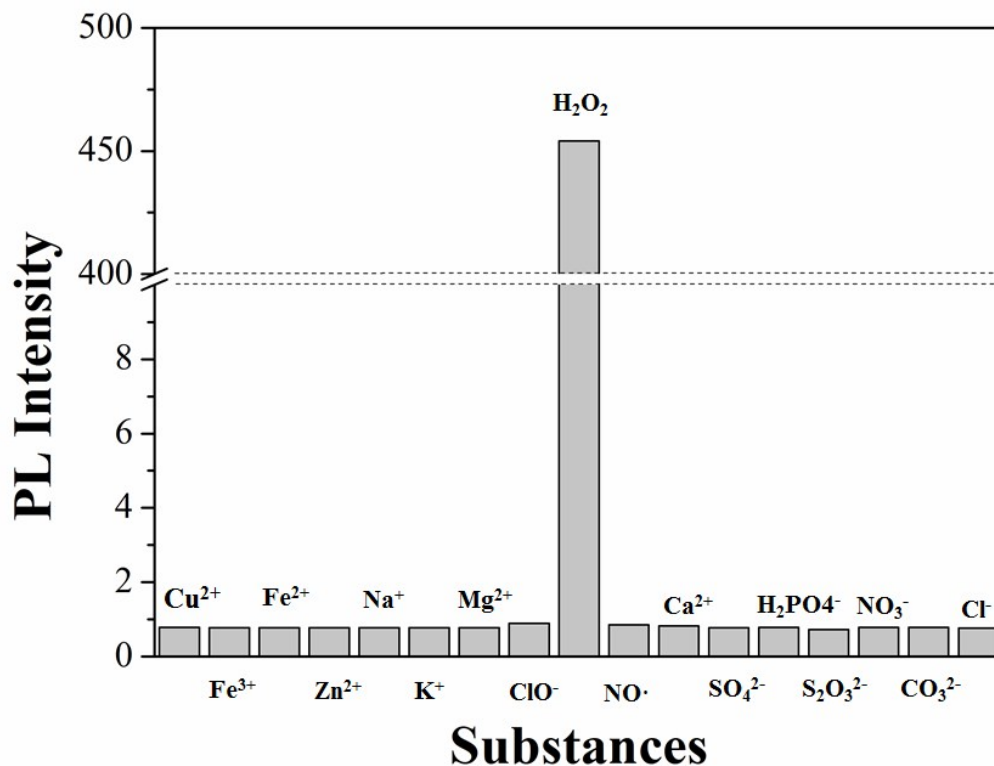

**Figure S9.** Fluorescence “turn-on” response of 0.1 mg/mL HNTs-PA upon different substances. Data were obtained at 25 °C in 2 mL H<sub>2</sub>O, with excitation at  $\lambda=470$  nm. The PL intensity represents the fluorescence intensity at the maximum emission wavelength.

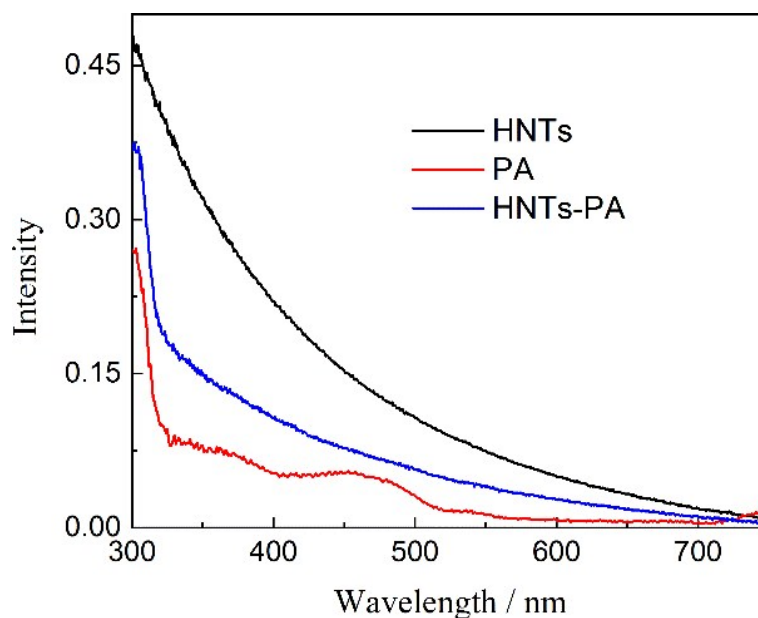

**Figure S10.** The UV-vis spectra of HNTs, PA and HNTs-PA

Spectrum processing :  
No peaks omitted

Processing option : All elements analyzed (Normalised)  
Number of iterations = 2

Standard :

C CaCO<sub>3</sub> 1-Jun-1999 12:00 AM  
O SiO<sub>2</sub> 1-Jun-1999 12:00 AM  
Al Al<sub>2</sub>O<sub>3</sub> 1-Jun-1999 12:00 AM  
Si SiO<sub>2</sub> 1-Jun-1999 12:00 AM

| Element | Weight% | Atomic% |
|---------|---------|---------|
| C K     | 6.26    | 11.25   |
| O K     | 28.30   | 38.17   |
| Al K    | 27.97   | 22.37   |
| Si K    | 31.39   | 24.12   |

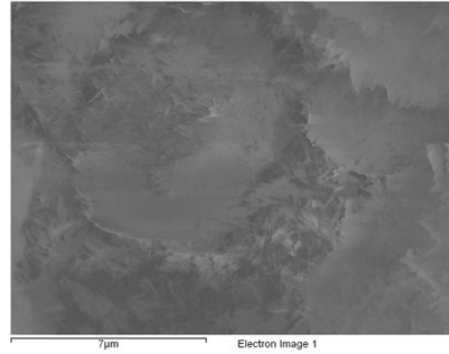

**Figure S11.** The energy dispersive spectra (EDS) results of HNTs-PA

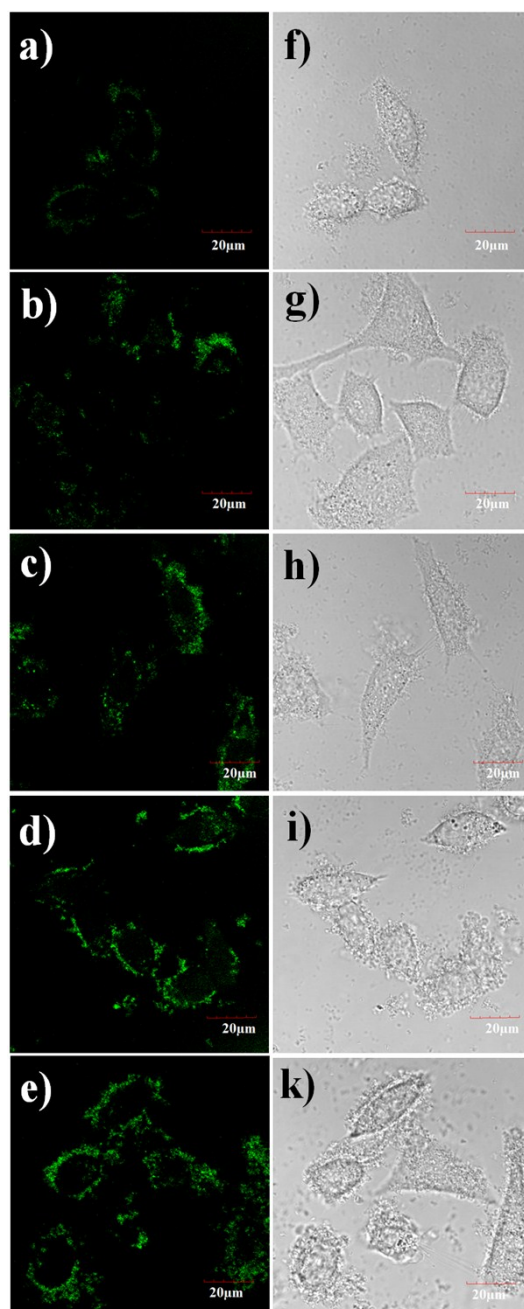

**Figure S12.** Confocal fluorescence images of living HeLa cells after treating with 0.5 mg/mL HNTs-PA for 1 (a and f), 2 (b and g), 4 (c and h), 8 (d and i) and 12 h (e and k) at 37 °C. The excitation wavelength was fixed at 488 nm and fluorescent signals were collected from 500 to 600 nm.



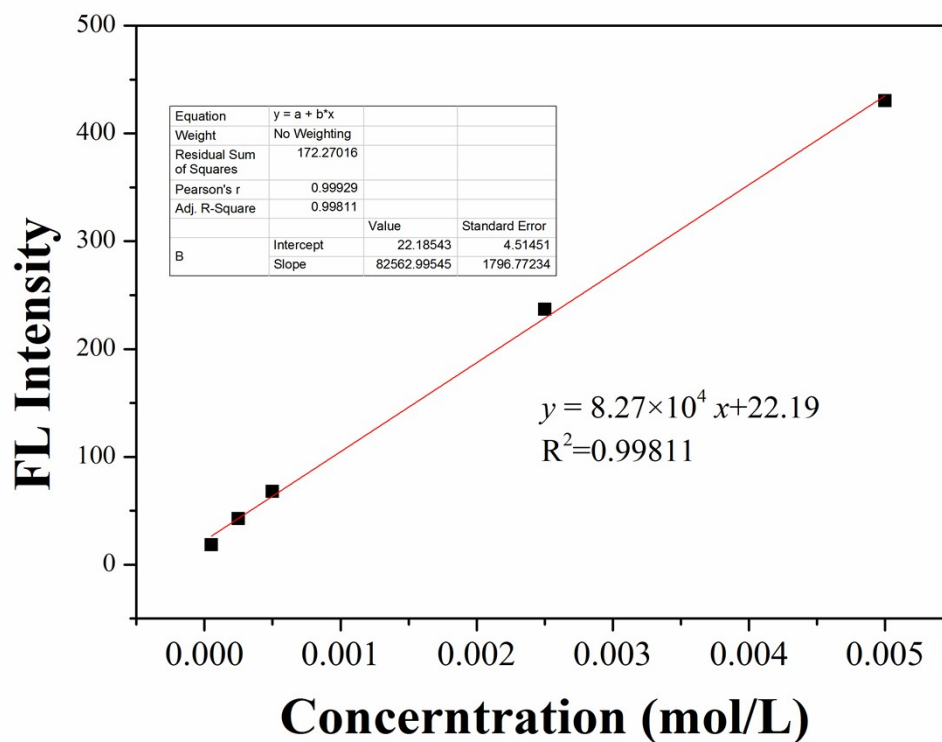

**Figure S13.** Plot of the fluorescence intensity of HNTs-PA solution vs the concentration of H<sub>2</sub>O<sub>2</sub> (fluorescence intensity was recorded at 20 min after the addition of H<sub>2</sub>O<sub>2</sub>). Results of the linear regression for fluorescence intensity and concentration of H<sub>2</sub>O<sub>2</sub> show that the linear correlation coefficient (R<sup>2</sup>) is greater than 0.99 which indicates that the fluorescence intensity of HNTs-PA solution and concentration of H<sub>2</sub>O<sub>2</sub> shows a good linearity relationship in the range from 5 × 10<sup>-5</sup> to 5 × 10<sup>-3</sup> M.

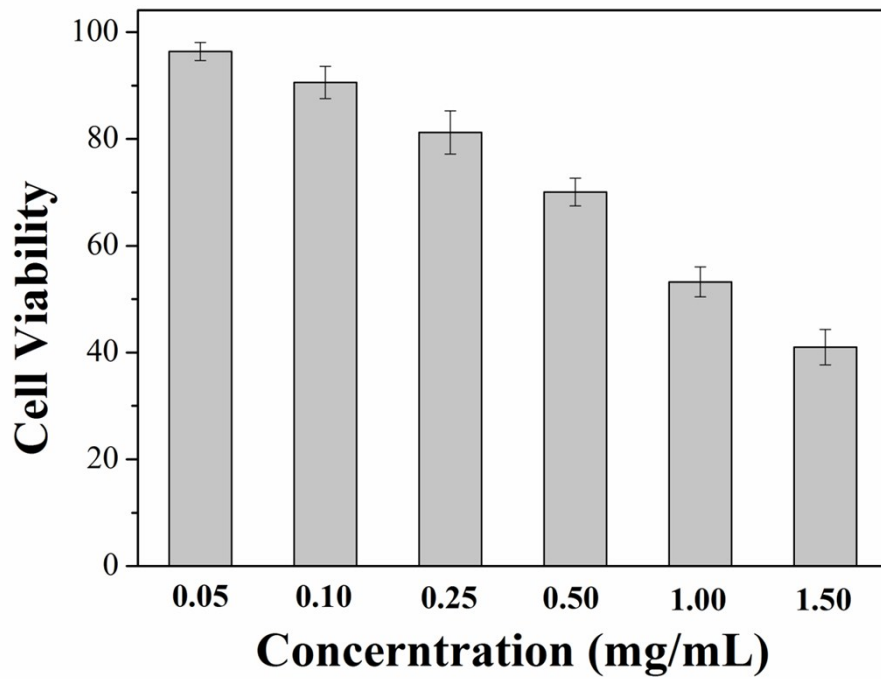

**Figure S14.** Cell viability of Hela cells at different concentrations of HNTs-PA. The  $IC_{50}$  value was calculated as 1.11 mg/mL
